# Supplementary material
Source: PubMed Central journal article supplement (PMC3418060)
Supplement: NIHMS317346-supplement-1_si_001.pdf [file NIHMS317346-supplement-1_si_001.pdf]

Supporting Information for

**Ligation of D1-His332 and D1-Asp170 to the Manganese Cluster of Photosystem II from  
*Synechocystis* Assessed by Multifrequency Pulse EPR Spectroscopy**

Troy A. Stich<sup>1</sup>, Gregory J. Yeagle<sup>1</sup>, Rachel J. Service<sup>2</sup>, Richard J. Debus<sup>2</sup>, R. David Britt<sup>1</sup>

1. Department of Chemistry, University of California, One Shields Avenue, Davis, CA 95616
2. Department of Biochemistry, University of California, Riverside, CA 92521

Contents

**Figure S1.** X-band two-pulse ESEEM of wild-type\* and D1-H332E PSII

**Figure S2.**  $K_a$ -band two-pulse ESEEM of BBY,  $^{14}\text{N}$ -PSII, and  $^{15}\text{N}$ -PSII

**Figure S3.** Effect of baseline correction on two-pulse ESEEM

**Figure S4.** Simulations of  $^{14}\text{N}$  ESEEM at multiple excitation frequencies

**Figure S5.** Contribution to ESEEM spectrum from cyt  $b_{559}$

**Figure S6-S7.**  $\tau$ -dependent three-pulse ESEEM spectra and simulations

**Figure S8.** Light and Dark spectra for D1-H332E

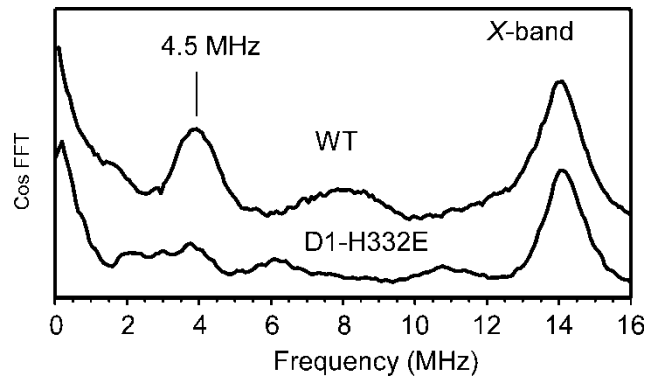

**Figure S1.** Comparison of cosine-backfilled Fourier transformed two-pulse ESEEM spectra for WT\* and D1-H332E mutant of PSII from *Synechocystis* sp. PCC 6803 obtained at 0.3420 mT with microwave frequency 9.235 GHz. Adapted from Figure 5 in Debus *et al.* 2001 *Biochemistry*.

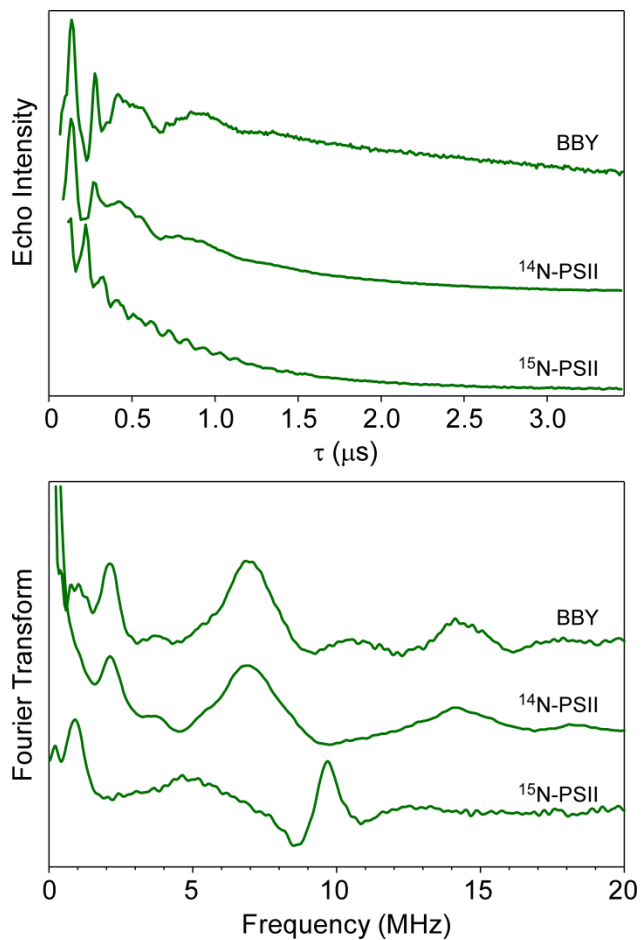

**Figure S2.** Time-domain (top) and corresponding cosine-backfilled Fourier transformed (bottom)  $K_a$ -band two-pulse ESEEM spectra of BBY, and  $^{14}\text{N}$ -PSII and  $^{15}\text{N}$ -PSII from *Synechocystis* obtained at  $g = 1.98$ . Instrument settings:  $\nu_{\text{MW}} = 30.757$  GHz,  $B_0 = 1.1079$  T,  $\pi/2 = 10$  ns,  $\Delta\tau = 15$  ns, repetition time = 5 ms,  $T = 4.5$  K.

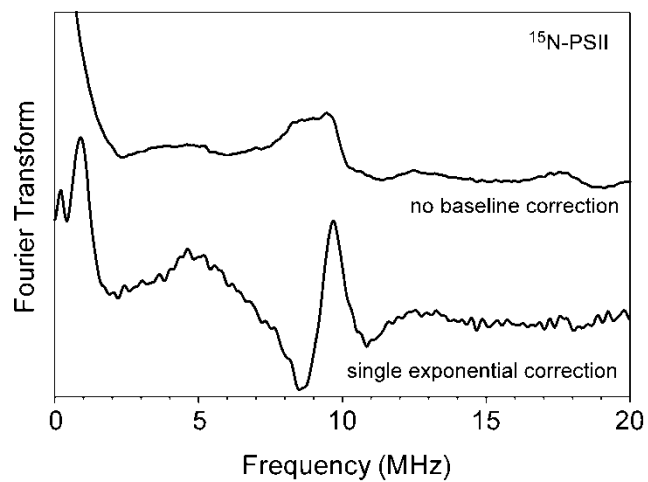

**Figure S3.** Effect of exponential baseline subtraction on Fourier transformed  $K_a$ -band two-pulse ESEEM of  $^{15}\text{N-PSII}$ . Spectrometer settings same as those listed in caption of Figure S2.

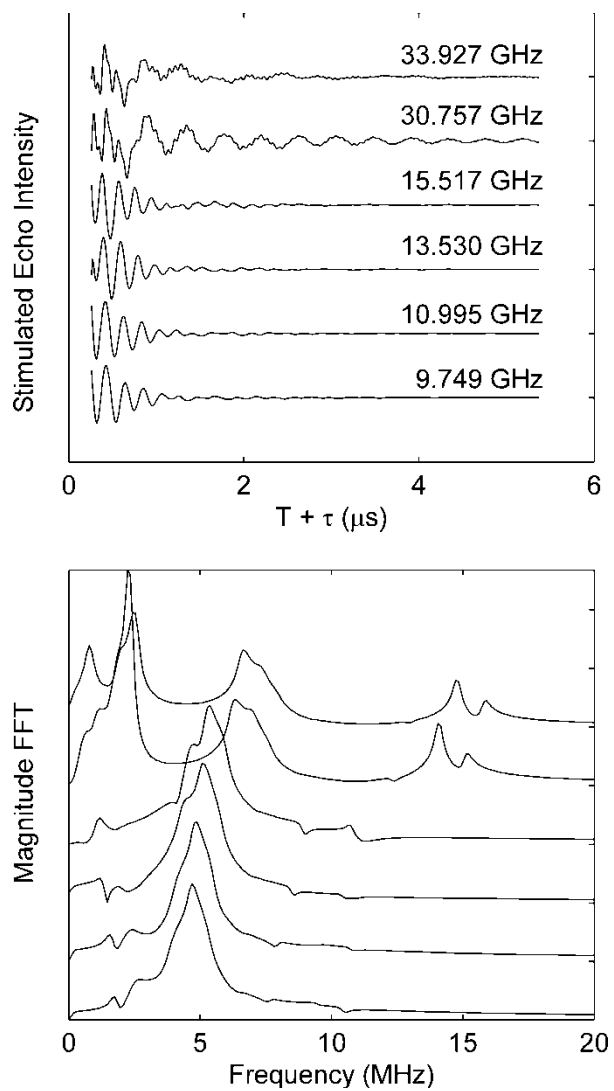

**Figure S4.** Multifrequency ( $B_0$  corresponds to  $g = 1.98$ ) three-pulse ESEEM spectra simulated using  $^{14}\text{N}$  magnetic parameters given in Table 1.

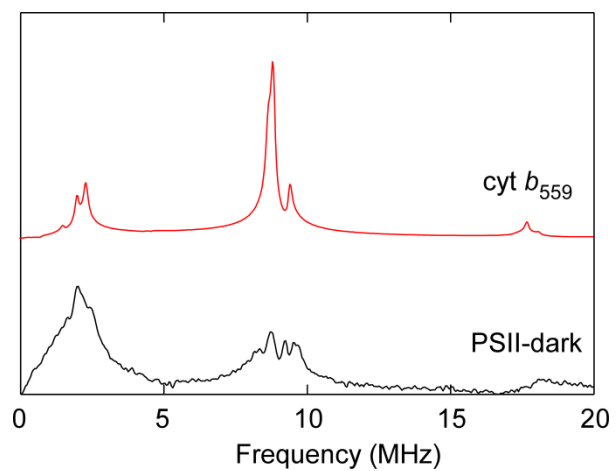

**Figure S5.** Comparison of  $Q$ -band three-pulse ESEEM spectrum of dark-adapted  $^{15}\text{N}$ -PSII and a simulation of the  $^{15}\text{N}$ -labeled cyt  $b_{559}$ . Spectrometer settings are same as those given in the caption of Figure 3.

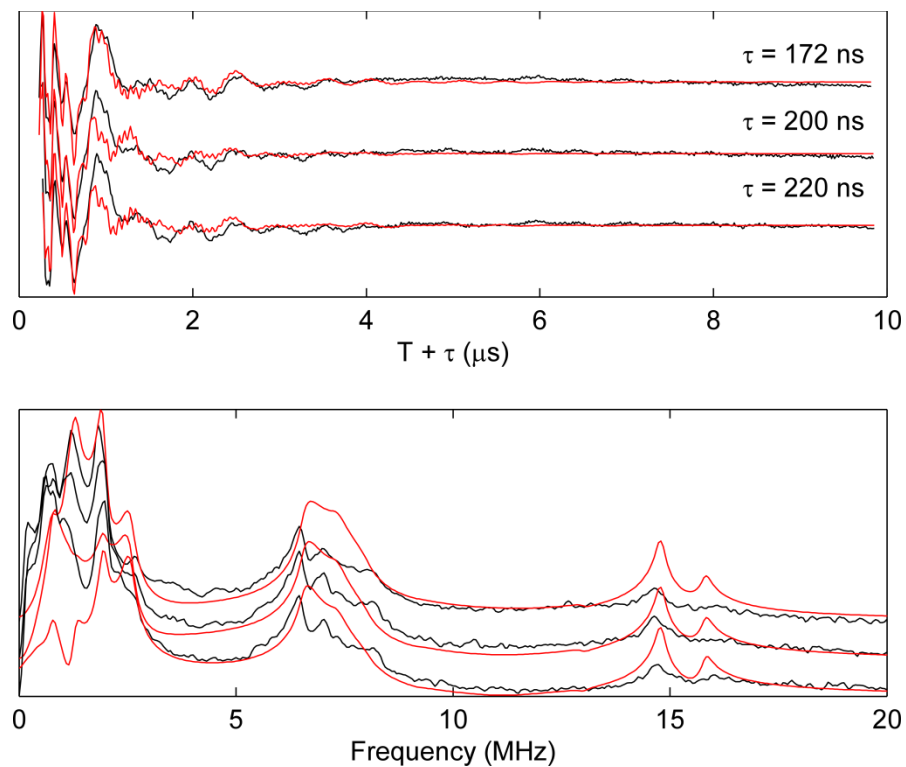

**Figure S6.**  $\tau$ -dependence of  $Q$ -band three-pulse ESEEM spectra of light-*minus*-dark  $^{14}\text{N}$ -PSII with corresponding simulations obtained using parameters given in Table 1. Spectrometer settings are same as those given in caption of Figure 3.

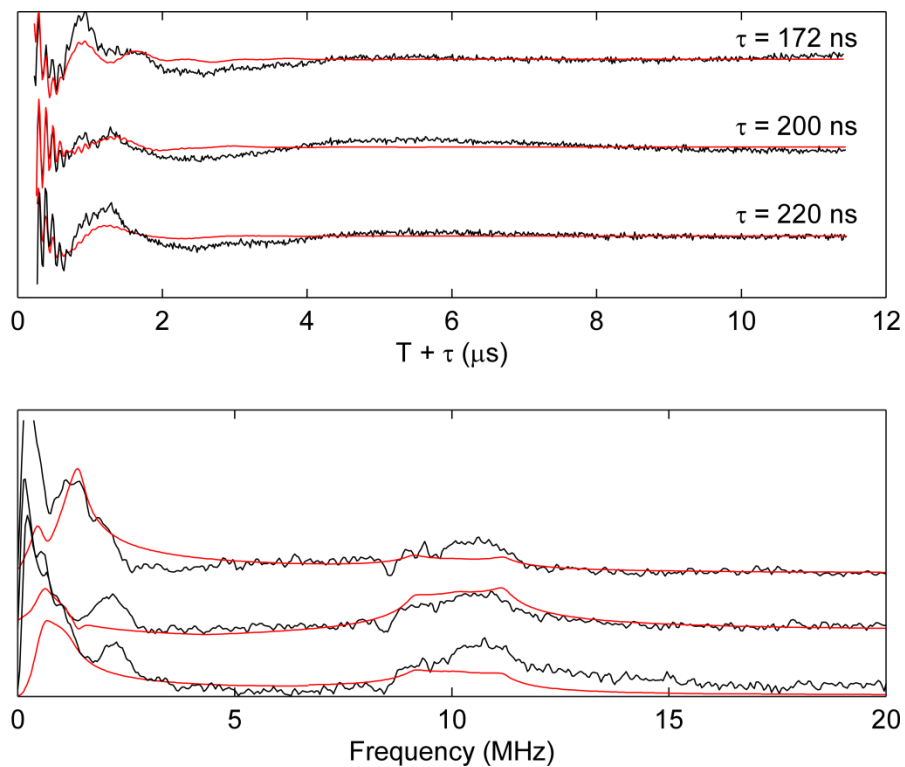

**Figure S7.**  $\tau$ -dependence of  $Q$ -band three-pulse ESEEM spectra of light-*minus*-dark  $^{15}\text{N}$ -PSII with corresponding simulations obtained using parameters given in Table 1. Spectrometer settings are same as those given in caption of Figure 3.



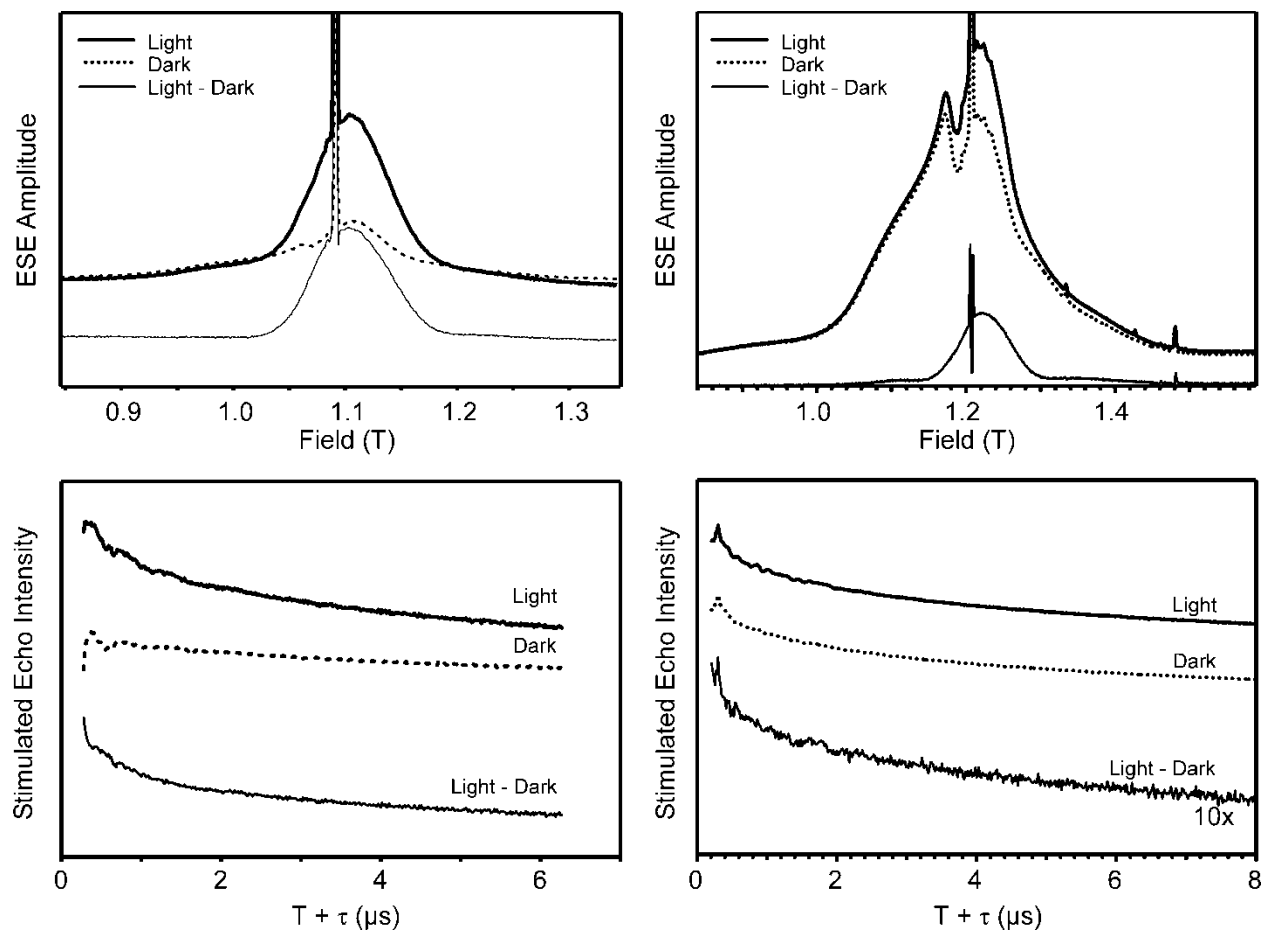

**Figure S8.** Light, dark, and difference ESE-EPR spectra (top) for D1-H332E acquired at  $K_a$ - ( $\nu_{MW} = 30.562$  GHz, left) and  $Q$ -band ( $\nu_{MW} = 33.859$  GHz, right) and corresponding three-pulse ESEEM spectra (bottom). Additional instrument settings for  $K_a$ -band ESE-EPR:  $\pi/2 = 30$  ns,  $\tau = 220$  ns,  $\Delta B_0 = 1$  mT, repetition time = 5 ms,  $T = 5.0$  K;  $K_a$ -band three-pulse ESEEM:  $B_0 = 1.1063$  T,  $\pi/2 = 10$  ns,  $\tau = 210$  ns,  $\Delta T = 15$  ns, repetition time = 5 ms;  $Q$ -band ESE-EPR:  $\pi/2 = 32$  ns,  $\tau = 200$  ns,  $\Delta B_0 = 1$  mT, repetition time = 5 ms,  $T = 4.5$  K;  $Q$ -band three-pulse ESEEM:  $B_0 = 1.2190$  T,  $\pi/2 = 16$  ns,  $\tau = 128$  ns,  $\Delta T = 16$  ns.
